# Supplementary material for: Unexpected rise of ozone in urban and rural areas, and sulfur dioxide in rural areas during the coronavirus city lockdown in Hangzhou, China: implications for air quality
Source: Springer Nature journal article supplement (doi:10.1007/s10311-020-01028-3), 2020-06-12
Supplement: MOESM1 [file 10311_2020_1028_MOESM1_ESM.docx]

**SUPPLEMENTARY MATERIAL**

Unexpected rises of ozone in urban and rural areas and sulfur dioxide in rural areas during the coronavirus city lockdown in Hangzhou, China: Implications for air quality

Liqiang Wang, Mengying Li, Shaocai Yu, Xue Chen, Zhen Li, Yibo Zhang, Linhui Jiang, Yan Xia, Jiali Li, Weiping Liu, Pengfei Li, Eric Lichtfouse, Daniel Rosenfeld and John H. Seinfeld

Environmental Chemistry Letters 2020

**Table S1**. Statistical summary of mean concentrations (mean ± standard deviation) in 2020 and concentration changes (percentages) of PM2.5, PM10, CO, NO2, SO2, and O3 in 2020 relative to those in the same periods of 2019 at urban and rural sites in Hangzhou. Before Lockdown (BL), During Lockdown (DL), and Resumption denote the periods of January 1–January 23, January 24–February 15, and February 16–February 28, respectively. Hourly average concentrations of PM2.5 in the urban area were 45.9±31.3 and 29.6±19.5 μg m-3 for the BL and DL periods, respectively. The simultaneous drop of hourly PM2.5 levels from 25.0±24.0 to 20.1±16.9 μg m-3 was observed at the rural site. Similar patterns were detected for PM10 with mean values decreasing significantly from 70.5 to 48.4 μg m-3 in the urban area and slightly from 31.0 to 24.1 μg m-3 at the rural site.

| Pollutants | | | O3 (μg m-3) | NO2 (μg m-3) | CO (mg m-3) | SO2 (μg m-3) | PM10 (μg m-3) | PM2.5 (μg m-3) |
| --- | --- | --- | --- | --- | --- | --- | --- | --- |
| Urban | Concentrations （2020） | BL | 24.6±21.0 | 44.2±15.4 | 1.0±0.24 | 6.3±1.6 | 70.5±45.9 | 45.9±31.3 |
| DL | 60.6±24.8 | 13.0±4.3 | 0.71±0.15 | 5.3±0.9 | 38.4±23.6 | 29.6±19.5 |
| Resumption | 65.0±28.8 | 21.8±9.5 | 0.59±0.12 | 5.6±0.9 | 54.8±32.0 | 31.7±17.8 |
| Changes relative to 2019 | BL | 8.5 (28.6%) | -7.1 (-13.7%) | -0.16 (-14.1%) | -2.6 (-29.2%) | -17.3 (-19.8%) | -15.1 (-24.8%) |
| DL | 13.9 (22.2%) | -18.3 (-58.4%) | -0.20 (-22.3%) | -2.1 (-28.6%) | -35.3 (-47.9%) | -22.1 (-42.7%) |
| Resumption | 38.4 (68.7%) | -22.2 (-51.5%) | -0.40 (-40.1%) | -3.3 (-36.7%) | -17.8 (-24.3%) | -22.4 (-41.5%) |
| Rural | Concentrations （2020） | BL | 42.0±24.0 | 21.0±12.2 | 0.78±0.16 | 4.7±1.1 | 31.0±26.1 | 25.0±24.0 |
| DL | 62.9±25.1 | 6.8±3.2 | 0.66±0.10 | 5.8±0.8 | 24.1±17.3 | 20.1±16.9 |
| Resumption | 64.6±27.3 | 6.4±4.3 | 0.60±0.13 | 6.1±1.9 | 38.2±20.5 | 24.7±16.1 |
| Changes relative to 2019 | BL | 8.3 (17.4%) | -1.1 (-4.8%) | -0.29 (-27.4%) | -5.7 (-54.8%) | -12.2 (-27.0%) | 0.98 (4.4%) |
| DL | 10.3 (15.7%) | -6.3 (-48.0%) | -0.17 (-20.8%) | -0.38 (-6.2%) | -15.8 (-39.6%) | -4.9 (-18.5%) |
| Resumption | 29.8 (47.0%) | -5.3 (-48.6%) | -0.23 (-29.1%) | -0.78 (-10.9%) | 9.7 (36.5%) | 5.7 (33.6%) |
